# Supplementary material for: Study on the structural design and performance of novel braid-reinforced and thermostable poly(m-phenylene isophthalamide) hollow fiber membranes
Source: Royal Society of Chemistry journal article supplement (doi:10.1039/c7ra01171g), 2017-01-01
Supplement: c7ra01171g1.pdf [file c7ra01171g1.pdf]

## Supplemental Information

# Study on Structure Design and Performance of a Novel Braid Reinforced and Thermostable Poly(m-phenylene isophthalamide) Hollow Fiber Membranes

Mingxing Chen, Changfa Xiao\*, Chun Wang, Hailiang Liu

State Key Laboratory of Separation Membranes and Membrane Processes, School of  
Material Science and Engineering, Tianjin Polytechnic University, Tianjin 300387,  
China

---

\* Corresponding author. Tel: +86 022-83955299  
E-mail address: xiaochangfa@163.com

Figure

Figure S1

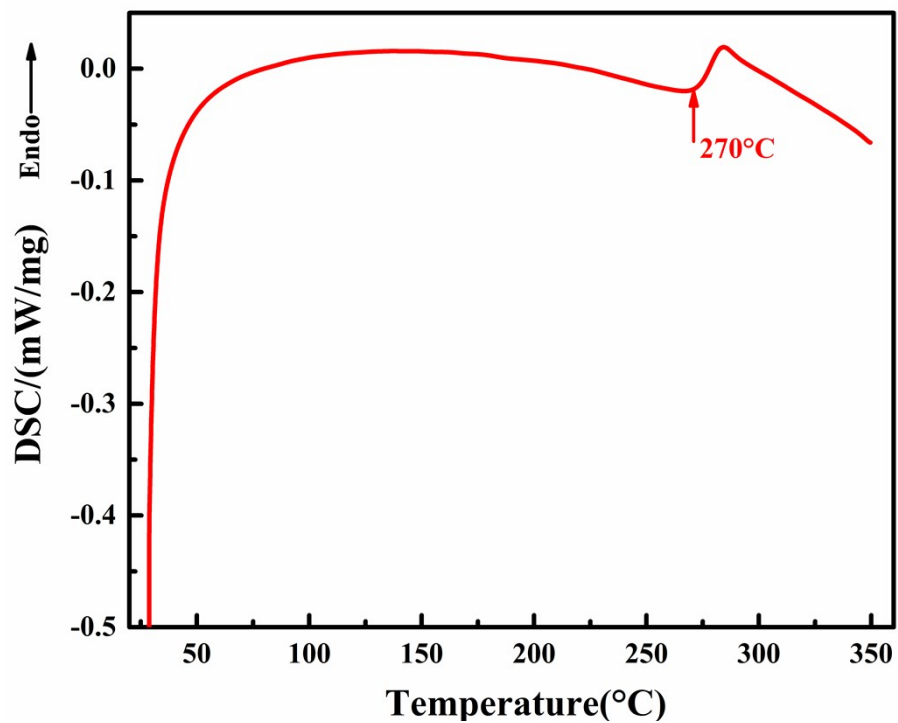

Figure S1. DSC curve of PMIA

Figure S2

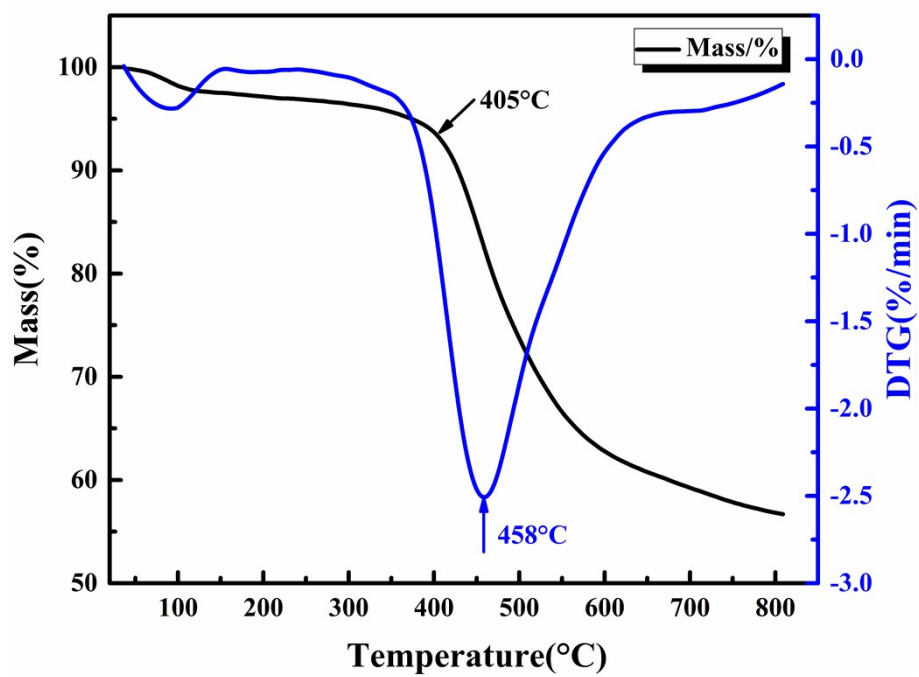

**Figure S2.** TGA curve of PMIA

**Figure S3**

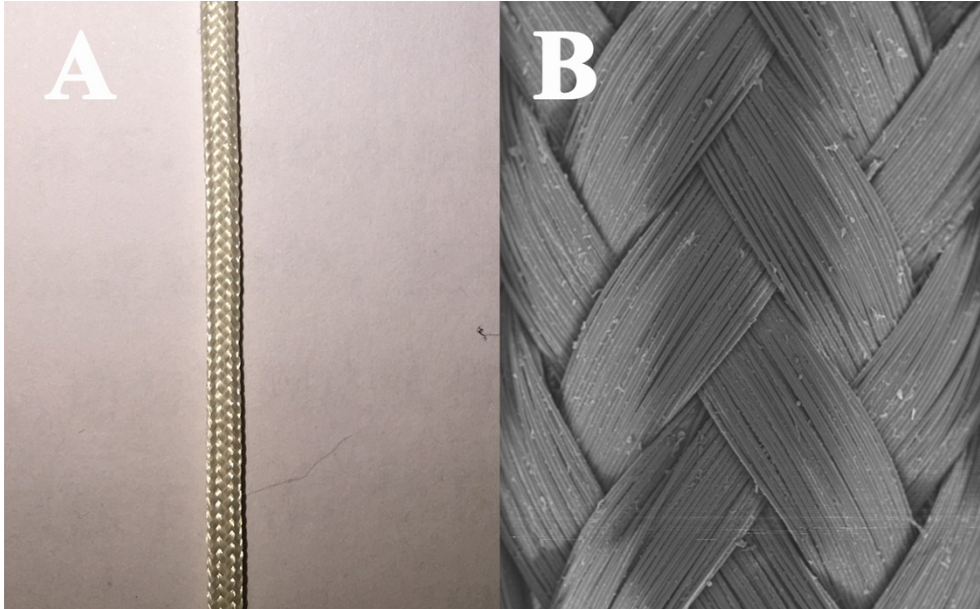

**Figure S3.** The photograph of reinforced braid

A: digital photograph; B: SEM photograph

**Figure S4**

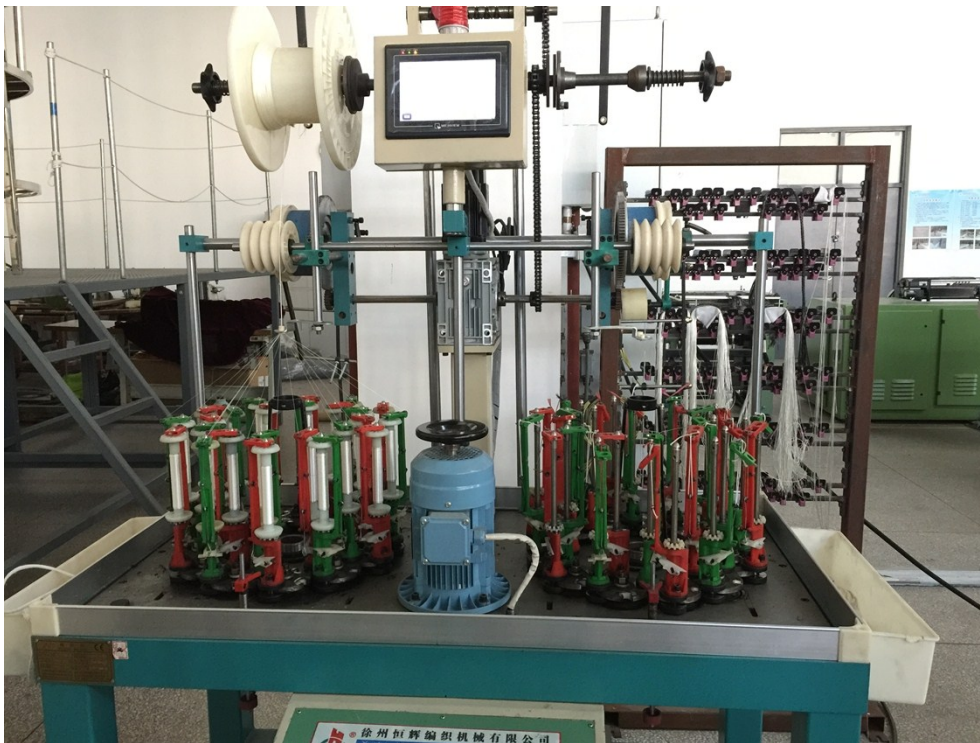

**Figure S4.** The digital photograph of braiding machine

Figure S5

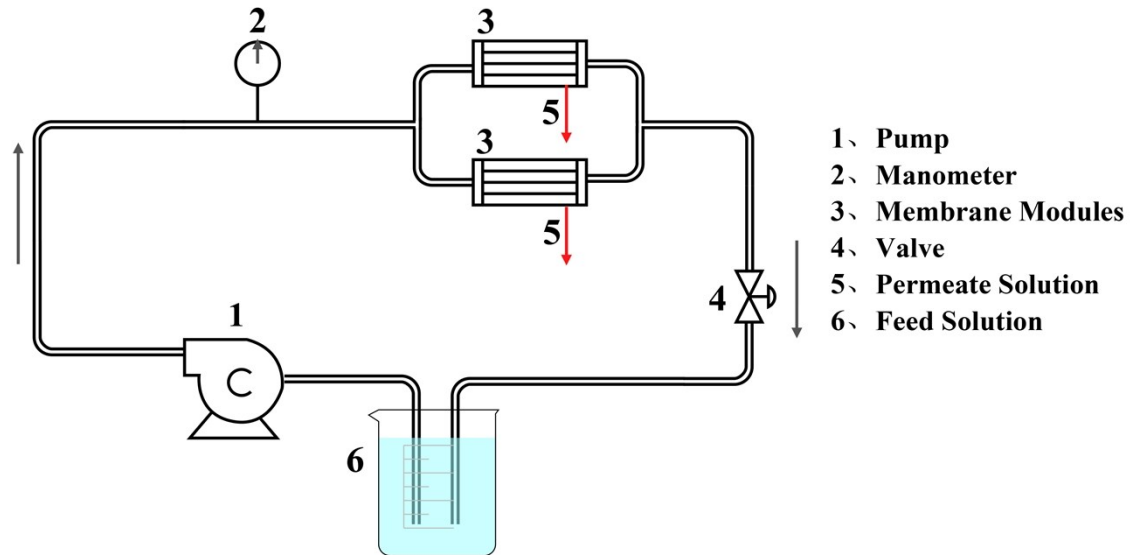

Figure S5. Schematic diagram of cross-flow filtration apparatus

Figure S6

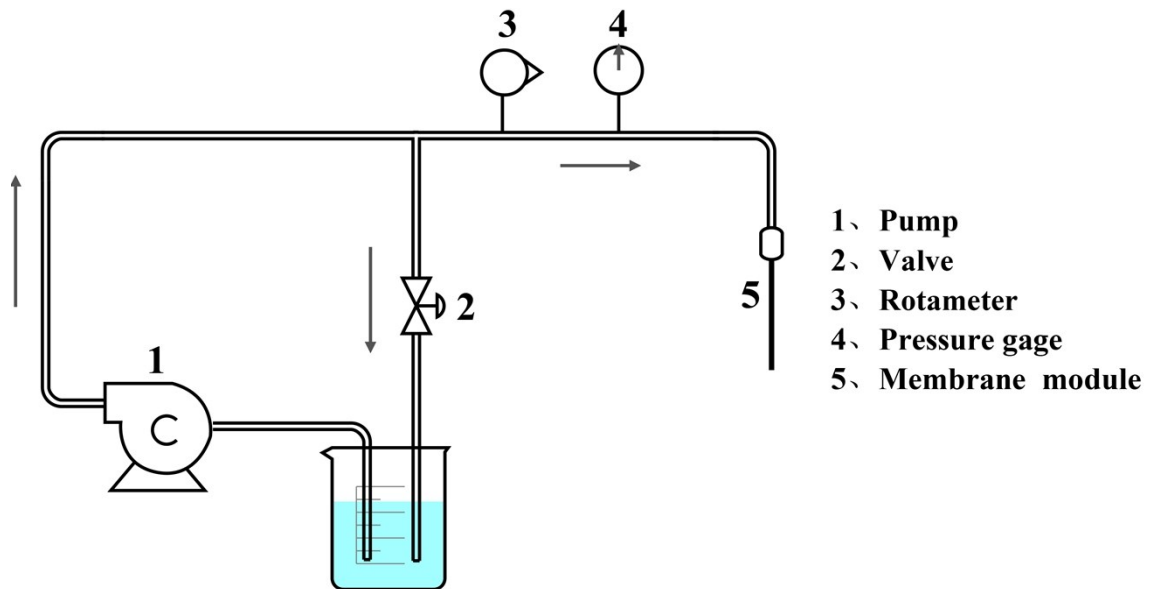

Figure S6. Schematic diagram of bursting test

Figure S7

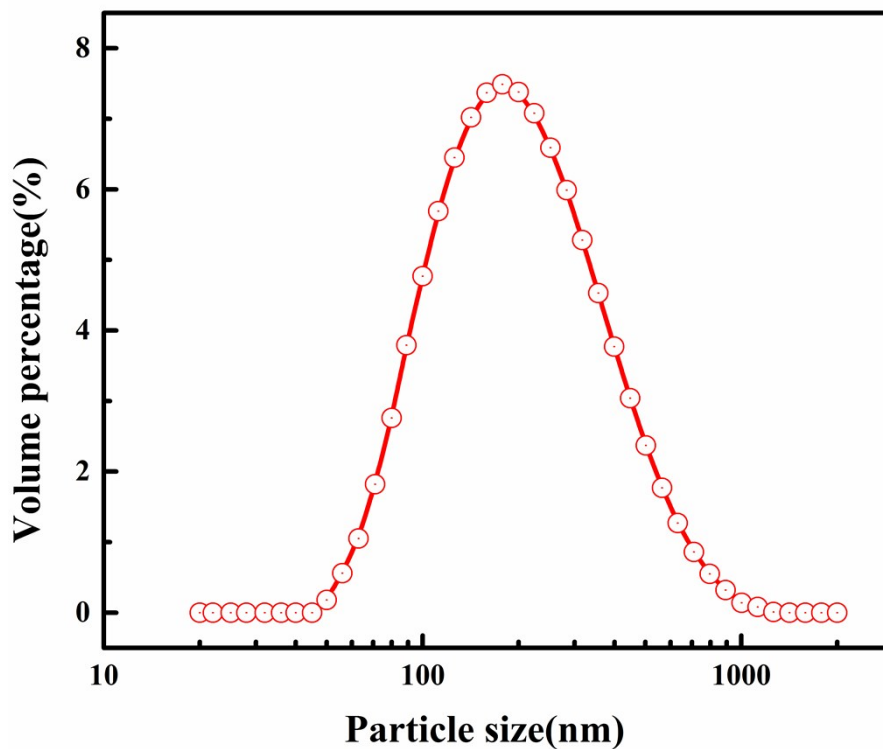

Figure S7. The particle size distribution of ink solution.

Figure S8

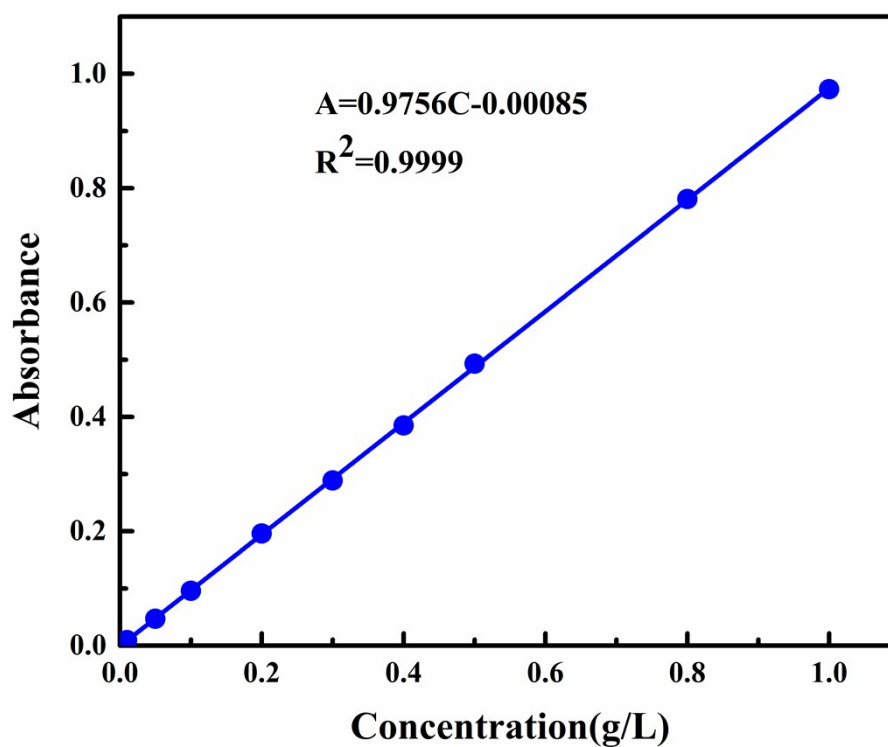

Figure S8. Standard concentration-absorbance curve of ink solution

**Figure S9**

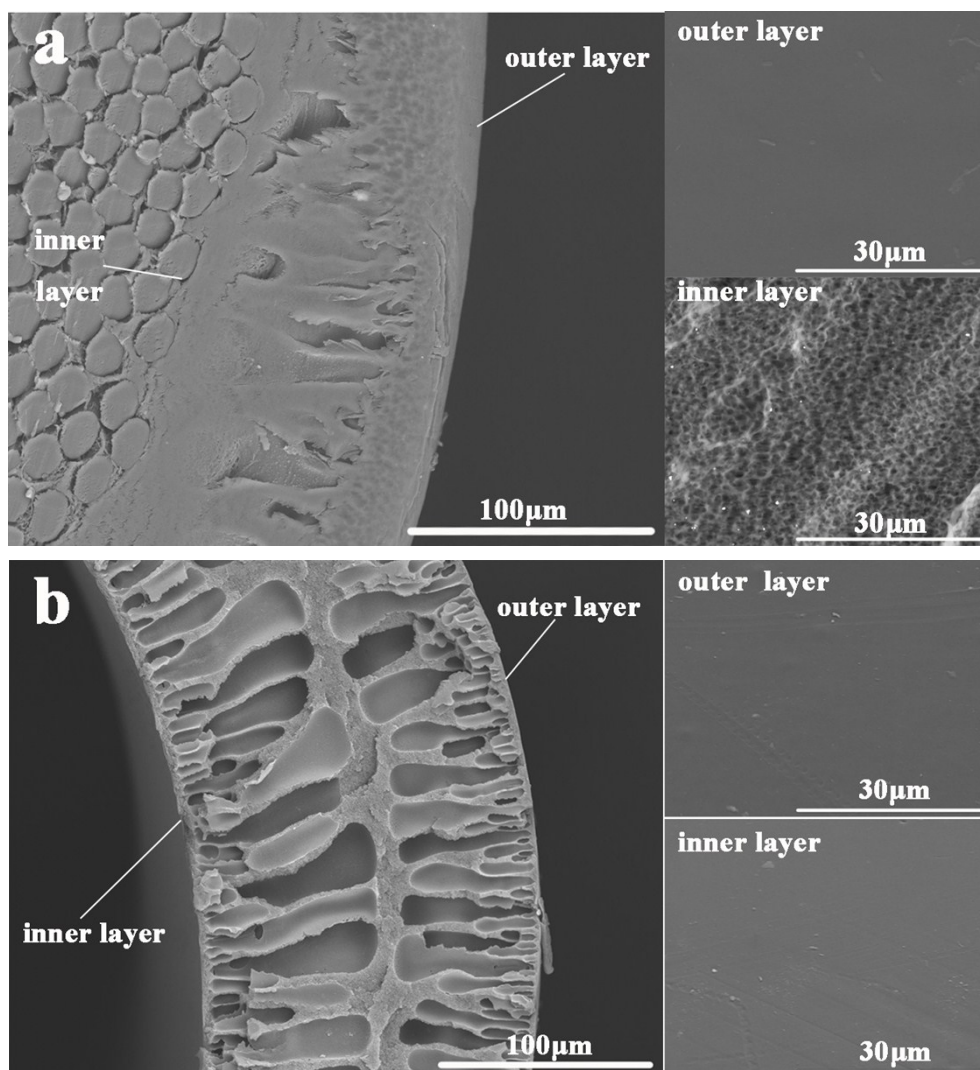

**Figure S9.** Morphology of cross section, inner layer and outer layer.

a: BR PMIA hollow fiber membranes; b: PMIA hollow fiber membranes.

## Table

**Table S1** The Parameters of PMIA and PET filaments

| Sample | Specification<br>(denier) | Density<br>(g/cm <sup>3</sup> ) | Breaking<br>elongation(%) | Breaking<br>strength(cN/dtex) |
|--------|---------------------------|---------------------------------|---------------------------|-------------------------------|
| PMIA   | 200D                      | 1.37                            | 34.1±1.3                  | 3.88±0.12                     |
| PET    | 200D                      | 1.38                            | 18.1±1.2                  | 7.67±0.24                     |

**Table S2** The characterizations of BR PMIA hollow fiber membranes

| Sample | Inner diameter(mm) | Outer diameter(mm) | Separation layer thickness(μm) |
|--------|--------------------|--------------------|--------------------------------|
| PMIA5  | 1.17±0.059         | 2.051±0.024        | 71±17                          |
| PMIA8  | 1.168±0.045        | 2.092±0.026        | 92±12.3                        |
| PMIA10 | 1.16±0.059         | 2.098±0.037        | 141±21.9                       |
| PMIA15 | 1.19±0.064         | 2.103±0.023        | 188.8±32.6                     |
| M2     | 1.064±0.083        | 2.226±0.035        | 163.8±31.17                    |
| M3     | 1.083±0.06         | 2.123±0.022        | 100±22.2                       |
